# Supplementary material for: Translation, transcultural adaptation and validation to Brazilian Portuguese of tools for adverse drug reaction assessment in children
Source: BMC Med Res Methodol. 2021 Jul 8;21:141. doi: 10.1186/s12874-021-01315-9 (PMC8265060; doi:10.1186/s12874-021-01315-9)
Supplement: Supplementary file 1 — Additional file 1. Evaluation of causality and avoidability assessment. [file 12874_2021_1315_MOESM1_ESM.xlsx]

## Sheet: Descrição 
	Supplementary file Translation, Transcultural Adaptation and Validation to Brazilian Portuguese of Tools for Adverse Drug Reaction Assessment in Children Elisangela da Costa Lima*1, Thais de Barros Fernandes1, Adair Freitas2, Juliana Freire de Lima Sias1, Marcelo Gerardin Poirot Land2, Mariana Tschoepke Aires2, Louise Bracken3, Matthew Peak3 * Correspondence: eclima.ufrj@gmail.com 1 School of Pha…
	CASE				CAUSALITY Assessment		AVOIDABILITY Assessment
Report Number	Patient Gender	Patient Age	Adverse Drug Reaction	Suspected Drugs	Pharmacist	Physician	Pharmacist	Physician
1	FEMALE	5y	1. Diarrhea	Cefepime, Amikacin	DEFINITE	DEFINITE	POSSIBLY AVOIDABLE	POSSIBLY AVOIDABLE
2	FEMALE	1y	2. Red man syndrome	Vancomycin	PROBABLE	PROBABLE	DEFINITELY AVOIDABLE	DEFINITELY AVOIDABLE
3	FEMALE	2y	3. Pruritus	Crystalline Penicillin	DEFINITE	PROBABLE	NOT AVOIDABLE	NOT AVOIDABLE
4	MALE	2w	4. Diaper rash	Gentamicin	POSSIBLE	PROBABLE	POSSIBLY AVOIDABLE	POSSIBLY AVOIDABLE
5A	MALE	4y	5. Vomiting	Amoxicillin Clavulanate, Ampicilin, Cefepime	POSSIBLE	PROBABLE	POSSIBLY AVOIDABLE	POSSIBLY AVOIDABLE
5B	FEMALE	4y	6. Diarrhea	Amoxicillin Clavulanate, Ampicilin, Cefepime	DEFINITE	DEFINITE	POSSIBLY AVOIDABLE	POSSIBLY AVOIDABLE
5C	FEMALE	4y	7. Constipation	Amoxicillin Clavulanate, Ampicilin, Cefepime	POSSIBLE	PROBABLE	POSSIBLY AVOIDABLE	POSSIBLY AVOIDABLE
6A	MALE	15y	8. Nausea and Vomiting	Cefepime	POSSIBLE	POSSIBLE	POSSIBLY AVOIDABLE	POSSIBLY AVOIDABLE
6B	MALE	15y	9. Diarrhea	Cefepime, Oxacilin	PROBABLE	PROBABLE	POSSIBLY AVOIDABLE	NOT AVOIDABLE
7	FEMALE	4y	10. Vomiting	Cefepime	UNLIKELY	UNLIKELY	POSSIBLY AVOIDABLE	POSSIBLY AVOIDABLE
8	MALE	1y	11. Diarrhea	Azithromycin, Cefepime	DEFINITE	DEFINITE	POSSIBLY AVOIDABLE	DEFINITELY AVOIDABLE
9	FEMALE	1w	12. Diaper rash	Crystalline Penicillin, Trimethoprim Sulfamethoxazole, Fluconazole	PROBABLE	PROBABLE	NOT AVOIDABLE	DEFINITELY AVOIDABLE
10	FEMALE	6y	13. Drug reaction with eosinophilia and systemic symptoms (DRESS)	Cefepime, Vancomycin, Linezolid	PROBABLE	PROBABLE	NOT AVOIDABLE	NOT AVOIDABLE
11	MALE	2y	14. Diarrhea	Fluconzole, Azithromycin	POSSIBLE	POSSIBLE	POSSIBLY AVOIDABLE	DEFINITELY AVOIDABLE
12	FEMALE	3y	15. Vomiting	Ampicilin, Gentamicin, Metronidazole	POSSIBLE	POSSIBLE	POSSIBLY AVOIDABLE	DEFINITELY AVOIDABLE
13	MALE	12y	16. Nausea	Cefepime, Azithromycin	UNLIKELY	UNLIKELY	DEFINITELY AVOIDABLE	DEFINITELY AVOIDABLE
14	FEMALE	5y	17. Nausea and Vomiting	Amoxicillin Clavulanate, Ampicilin	PROBABLE	PROBABLE	NOT AVOIDABLE	DEFINITELY AVOIDABLE
15	MALE	2y	18. Anaphylaxis	Oxacilin,	PROBABLE	PROBABLE	NOT AVOIDABLE	NOT AVOIDABLE
16	MALE	3y	19. Nauseas and Vomiting	Amoxicillin Clavulanate, Cefuroxime	DEFINITE	DEFINITE	DEFINITELY AVOIDABLE	DEFINITELY AVOIDABLE
17A	FEMALE	1y	20. Diarrhea	Amoxicillin Clavulanate, Oxacilin	DEFINITE	DEFINITE	POSSIBLY AVOIDABLE	POSSIBLY AVOIDABLE
17B	FEMALE	1y	21. Vomiting	Amoxicillin Clavulanate, Oxacilin	UNLIKELY	UNLIKELY	DEFINITELY AVOIDABLE	DEFINITELY AVOIDABLE
18	FEMALE	5w	22. Eczema	Crystalline Penicillin, Amoxicillin	POSSIBLE	POSSIBLE	NOT AVOIDABLE	NOT AVOIDABLE
19	FEMALE	2w	23. Dry cough	Cefepime, Azithromycin	POSSIBLE	POSSIBLE	NOT AVOIDABLE	NOT AVOIDABLE
20	MALE	4w	24. Rash	Cefepime, Vancomycin	POSSIBLE	POSSIBLE	NOT AVOIDABLE	NOT AVOIDABLE
21	FEMALE	17y	25. Nausea and Vomiting	Cefepime,	UNLIKELY	POSSIBLE	DEFINITELY AVOIDABLE	DEFINITELY AVOIDABLE
22	FEMALE	7y	26. Diarrhea	Oxacilin	POSSIBLE	POSSIBLE	DEFINITELY AVOIDABLE	DEFINITELY AVOIDABLE
Age: Y - years old and W - weeks old

## Sheet: Plan1
Cefepime, Amikacin	Cefepime	Amikacin
Vancomycin	Vancomycin
Crystalline Penicillin	Crystalline Penicillin
Gentamicin	Gentamicin
Amoxicillin Clavulanate, Ampicilin, Cefepime	Amoxicillin Clavulanate	Ampicilin	Cefepime
Amoxicillin Clavulanate, Ampicilin, Cefepime	Amoxicillin Clavulanate	Ampicilin	Cefepime
Amoxicillin Clavulanate, Ampicilin, Cefepime	Amoxicillin Clavulanate	Ampicilin	Cefepime
Cefepime	Cefepime
Cefepime, Oxacilin	Oxacilin	Cefepime
Cefepime	Cefepime
Azithromycin, Cefepime	Azithromycin	Cefepime
Crystalline Penicillin, Trimethoprim Sulfamethoxazole, Fluconazole	Crystalline Penicillin	Trimethoprim Sulfamethoxazole	Fluconzole
Cefepime, Vancomycin, Linezolid	Cefepime	Vancomycin	Linezolid
Fluconzole, Azithromycin	Fluconzole	Azithromycin
Ampicilin, Gentamicin, Metronidazole	Ampicilin	Gentamicin	Metronidazole
Cefepime, Azithromycin	Cefepime	Azithromycin
Amoxicillin Clavulanate, Ampicilin	Amoxicillin Clavulanate	Ampicilin
Oxacilin,	Oxacilin
Amoxicillin Clavulanate, Cefuroxime	Amoxicillin Clavulanate	Cefuroxime
Amoxicillin Clavulanate, Oxacilin	Amoxicillin Clavulanate	Oxacilin
Amoxicillin Clavulanate, Oxacilin	Amoxicillin Clavulanate	Oxacilin
Crystalline Penicillin, Amoxicillin	Crystalline Penicillin	Amoxicillin
Cefepime, Azithromycin	Cefepime	Azithromycin
Cefepime, Vancomycin	Cefepime	Vancomycin
Cefepime,	Cefepime

## Sheet: Causalidade
Suspected Cases	Report Number	Pharmacist	Physician
1. Diarrhea	1	4	4
2. Red man syndrome	2	3	3
3. Pruritus	3	4	3
4. Diaper rash	4	2	3
5. Vomiting	5A	2	3
6. Diarrhea	5B	4	4
7. Constipation	5C	2	3
8. Nausea and Vomiting	6A	2	2
9. Diarrhea	6B	3	3
10. Vomiting	7	1	1
11. Diarrhea	8	4	4
12. Diaper rash	9	3	3
13. Drug reaction with eosinophilia and systemic symptoms (DRESS)	10	3	3
14. Diarrhea	11	2	2
15. Vomiting	12	2	2
16. Nausea	13	1	1
17. Nausea and Vomiting	14	3	3
18. Anaphylaxis	15	3	3
19. Nauseas and Vomiting	16	4	4
20. Diarrhea	17A	4	4
21. Vomiting	17B	1	1
22. Eczema	18	2	2
23. Dry cough	19	2	2
24. Rash	20	2	2
25. Nausea and Vomiting	21	1	2
26. Diarrhea	22	2	2

## Sheet: Evitabilidade
Suspected Cases	Report Number	Pharmacist	Physician
1. Diarrhea	1	2	2
2. Red man syndrome	2	3	3
3. Pruritus	3	1	1
4. Diaper rash	4	2	2
5. Vomiting	5A	2	2
6. Diarrhea	5B	2	2
7. Constipation	5C	2	2
8. Nausea and Vomiting	6A	2	2
9. Diarrhea	6B	2	1
10. Vomiting	7	2	2
11. Diarrhea	8	2	3
12. Diaper rash	9	1	2
13. Drug reaction with eosinophilia and systemic symptoms (DRESS)	10	1	1
14. Diarrhea	11	2	3
15. Vomiting	12	2	3
16. Nausea	13	3	3
17. Nausea and Vomiting	14	1	3
18. Anaphylaxis	15	1	1
19. Nauseas and Vomiting	16	3	3
20. Diarrhea	17A	2	2
21. Vomiting	17B	3	3
22. Eczema	18	1	1
23. Dry cough	19	1	1
24. Rash	20	1	1
25. Nausea and Vomiting	21	3	3
26. Diarrhea	22	3	3
